# Supplementary material for: Two Level Trade Credit Policy Approach in Inventory Model with Expiration Rate and Stock Dependent Demand under Nonzero Inventory and Partial Backlogged Shortages
Source: MDPI journal article supplement (doi:10.3390/su132313493), 2021-12-06
Supplement: s1 [file s1]

Supplementary material for the paper:

# Two Level Trade Credit Policy Approach in Inventory Model with Expiration Rate and Stock Dependent Demand under Nonzero Inventory and Partial Backlogged Shortages

By Ali Akbar Shaikh, Leopoldo Eduardo Cárdenas-Barrón, Amalesh Kumar Manna, Armando Céspedes-Mota and Gerardo Treviño-Garza

## Supplementary A Detailed calculations

Equation (7) is

$$\frac{1}{2m} \alpha W^\beta t_1^2 - \alpha W^\beta t_1 + Q = \left[ \frac{\alpha(1-\beta)}{2m} \{t_1^2 + 2m(T-t_1) - T^2\} + B^{1-\beta} \right]^{\frac{1}{1-\beta}} \quad (\text{A.1})$$

By using equation (6), it is obtained

$$W = \left[ \frac{\alpha(1-\beta)}{2m} \{t_1^2 + 2m(T-t_1) - T^2\} + B^{1-\beta} \right]^{\frac{1}{1-\beta}} \quad (\text{A.2})$$

From equation (A.2), it is determined the value of  $t_1$  is given by

$$t_1 = m \pm \sqrt{(m-T)^2 + \frac{2m(W^{1-\beta} - B^{1-\beta})}{\alpha(1-\beta)}} \geq 0 \quad (\text{A.3})$$

Here, it is considered that the value of  $t_1$  is given in the following form

$$t_1 = m - \sqrt{(m-T)^2 + \frac{2m(W^{1-\beta} - B^{1-\beta})}{\alpha(1-\beta)}} \geq 0 \quad (\text{A.4})$$

The initial stock  $Q$  is

$$Q = W + \frac{\alpha W^\beta}{2m} \left[ m^2 - (m-T)^2 - \frac{2m(W^{1-\beta} - B^{1-\beta})}{\alpha(1-\beta)} \right] \quad (\text{A.5})$$

The first partial derivative of equation (A.5) with respect to  $W$  is

$$\begin{aligned} \frac{\partial Q}{\partial W} &= \frac{\alpha \beta W^{\beta-1}}{2m} \left[ m^2 - (m-T)^2 - \frac{2m(W^{1-\beta} - B^{1-\beta})}{\alpha(1-\beta)} \right] \\ \frac{\partial Q}{\partial W} &= \frac{\beta}{W} \frac{\alpha W^\beta}{2m} \left[ m^2 - (m-T)^2 - \frac{2m(W^{1-\beta} - B^{1-\beta})}{\alpha(1-\beta)} \right] \\ \frac{\partial Q}{\partial W} &= \frac{\beta(Q-W)}{W} > 0 \end{aligned}$$

(A.6)

The first partial derivative of equation (A.5) with respect to  $B$  is

$$\frac{\partial Q}{\partial B} = \left(\frac{W}{B}\right)^\beta > 0 \quad (\text{A.7})$$

The second partial derivative of equation (A.5) with respect to  $W$  is

$$\frac{\partial^2 Q}{\partial W^2} = \frac{-\beta W \left(\frac{\beta(Q-W)}{W} - 1\right) - \beta(Q-W)}{W^2} < 0 \quad (\text{A.8})$$

The second partial derivative of equation (A.5) with respect to  $B$  is

$$\frac{\partial^2 Q}{\partial B^2} = \frac{-\beta W^\beta}{B^{1+\beta}} < 0 \quad (\text{A.9})$$

The cross partial derivative of equation (A.7) with respect to  $W$  is

$$\frac{\partial^2 Q}{\partial B \partial W} = \frac{\beta W^{\beta-1}}{B^\beta} > 0 \quad (\text{A.10})$$

The first partial derivative of the holding cost with respect to  $B$  is

$$\frac{\partial chol}{\partial B} = h \left( \frac{\partial chol_1}{\partial B} + \frac{\partial chol_2}{\partial B} \right) \quad (\text{A.11})$$

The second partial derivative of the holding cost with respect to  $B$  is

$$\frac{\partial^2 chol}{\partial B^2} = h \left( \frac{\partial^2 chol_1}{\partial B^2} + \frac{\partial^2 chol_2}{\partial B^2} \right) \quad (\text{A.12})$$

The expressions of the first and second derivatives for  $chol_1$  and  $chol_2$  with respect to  $B$  are given below.

$$\begin{aligned} \frac{\partial chol_1}{\partial B} &= \frac{\partial Q}{\partial B} t_1 + Q \frac{\partial t_1}{\partial B} + \frac{\alpha W^\beta t_1^2}{2m} \frac{\partial t_1}{\partial B} - \alpha W^\beta t_1 \frac{\partial t_1}{\partial B} \\ \frac{\partial chol_2}{\partial B} &= \frac{(T-t_1)}{2} - \frac{(W+B)}{2} \frac{\partial t_1}{\partial B} \\ \frac{\partial^2 chol_1}{\partial B^2} &= \frac{\partial^2 Q}{\partial B^2} t_1 + 2 \frac{\partial Q}{\partial B} \frac{\partial t_1}{\partial B} + Q \frac{\partial^2 t_1}{\partial B^2} + \frac{\alpha W^\beta t_1}{m} \left( \frac{\partial t_1}{\partial B} \right)^2 + \frac{\alpha W^\beta t_1^2}{2m} \frac{\partial^2 t_1}{\partial B^2} - \alpha W^\beta \left( \frac{\partial t_1}{\partial B} \right)^2 - \alpha W^\beta \frac{\partial^2 t_1}{\partial B^2} \\ \frac{\partial^2 chol_2}{\partial B^2} &= -\frac{1}{2} \frac{\partial t_1}{\partial B} - \frac{1}{2} \frac{\partial t_1}{\partial B} - \frac{(W+B)}{2} \frac{\partial^2 t_1}{\partial B^2} \\ \frac{\partial^2 chol_2}{\partial B^2} &= -\frac{\partial t_1}{\partial B} - \frac{(W+B)}{2} \frac{\partial^2 t_1}{\partial B^2} \end{aligned}$$

The first partial derivative of the holding cost with respect to  $W$  is

$$\frac{\partial chol}{\partial W} = h \left( \frac{\partial chol_1}{\partial W} + \frac{\partial chol_2}{\partial W} \right) \quad (\text{A.13})$$

The second partial derivative of the holding cost with respect to  $W$  is

$$\frac{\partial^2 chol}{\partial W^2} = h \left( \frac{\partial^2 chol_1}{\partial W^2} + \frac{\partial^2 chol_2}{\partial W^2} \right) \quad (\text{A.14})$$

The expressions of the first and second derivatives for  $chol_1$  and  $chol_2$  with respect to  $W$  are given below

$$\frac{\partial chol_1}{\partial W} = \frac{\partial Q}{\partial W} t_1 + Q \frac{\partial t_1}{\partial W} + \frac{\alpha \beta W^{\beta-1} t_1^3}{6m} + \frac{\alpha W^\beta t_1^2}{2m} \frac{\partial t_1}{\partial W} - \frac{\alpha \beta W^{\beta-1} t_1^2}{2} - \alpha W^\beta t_1 \frac{\partial t_1}{\partial W}$$

$$\begin{aligned}
\frac{\partial chol_2}{\partial W} &= \frac{(T-t_1)}{2} - \frac{(W+B)}{2} \frac{\partial t_1}{\partial W} \\
\frac{\partial^2 chol_1}{\partial W^2} &= \frac{\partial^2 Q}{\partial W^2} t_1 + 2 \frac{\partial Q}{\partial W} \frac{\partial t_1}{\partial W} + Q \frac{\partial^2 t_1}{\partial W^2} + \frac{\alpha\beta(\beta-1)W^{\beta-2}t_1^3}{6m} + \frac{\alpha\beta W^{\beta-1}t_1^2}{2m} \frac{\partial t_1}{\partial W} + \frac{\alpha\beta W^{\beta-1}t_1^2}{2m} \frac{\partial t_1}{\partial W} \\
&\quad + \frac{\alpha W^{\beta}t_1}{m} \left( \frac{\partial t_1}{\partial W} \right)^2 + \frac{\alpha W^{\beta}t_1^2}{2m} \frac{\partial^2 t_1}{\partial W^2} - \frac{\alpha\beta(\beta-1)W^{\beta-2}t_1^2}{2} - \alpha\beta W^{\beta-1}t_1 \frac{\partial t_1}{\partial W} - \alpha\beta W^{\beta-1}t_1 \frac{\partial t_1}{\partial W} \\
&\quad - \alpha W^{\beta} \left( \frac{\partial t_1}{\partial W} \right)^2 - \alpha W^{\beta}t_1 \frac{\partial^2 t_1}{\partial W^2} \\
\frac{\partial^2 chol_2}{\partial W^2} &= -\frac{1}{2} \frac{\partial t_1}{\partial W} - \frac{1}{2} \frac{\partial t_1}{\partial W} - \frac{(W+B)}{2} \frac{\partial^2 t_1}{\partial W^2} \\
&= -\frac{\partial t_1}{\partial W} - \frac{(W+B)}{2} \frac{\partial^2 t_1}{\partial W^2}
\end{aligned}$$

The first partial derivative of the holding cost with respect to  $T$  is

$$\frac{\partial chol}{\partial T} = h \left( \frac{\partial chol_1}{\partial T} + \frac{\partial chol_2}{\partial T} \right) \quad (\text{A.15})$$

The second partial derivative of the holding cost respect to  $T$  is

$$\frac{\partial^2 chol}{\partial T^2} = h \left( \frac{\partial^2 chol_1}{\partial T^2} + \frac{\partial^2 chol_2}{\partial T^2} \right) \quad (\text{A.16})$$

The expressions of the first and second derivatives for  $chol_1$  and  $chol_2$  with respect to  $T$  are given bellow

$$\begin{aligned}
\frac{\partial chol_1}{\partial T} &= \frac{\partial Q}{\partial T} t_1 + Q \frac{\partial t_1}{\partial T} + \frac{\alpha W^{\beta}t_1^2}{2m} \frac{\partial t_1}{\partial T} - \alpha W^{\beta}t_1 \frac{\partial t_1}{\partial T} \\
\frac{\partial chol_2}{\partial T} &= \frac{(W+B)}{2} \left\{ 1 - \frac{\partial t_1}{\partial T} \right\} \\
\frac{\partial^2 chol_1}{\partial T^2} &= \frac{\partial^2 Q}{\partial T^2} t_1 + 2 \frac{\partial Q}{\partial T} \frac{\partial t_1}{\partial T} + Q \frac{\partial^2 t_1}{\partial T^2} + \frac{\alpha W^{\beta}t_1}{m} \left( \frac{\partial t_1}{\partial T} \right)^2 + \frac{\alpha W^{\beta}t_1^2}{2m} \frac{\partial^2 t_1}{\partial T^2} - \alpha W^{\beta} \left( \frac{\partial t_1}{\partial T} \right)^2 - \alpha W^{\beta} \frac{\partial^2 t_1}{\partial T^2} \\
\frac{\partial^2 chol_2}{\partial T^2} &= -\frac{(W+B)}{2} \frac{\partial^2 t_1}{\partial T^2}
\end{aligned}$$

Interest earned for Case 1

The first partial derivative of the interest earned for Case 1 with respect to  $W$  is

$$\frac{\partial IE}{\partial W} = pI_e \frac{\alpha\beta W^{\beta-1}}{m} \left[ \frac{m}{2} (M^2 - N^2) - \frac{(M^3 - N^3)}{6} \right]$$

(A.17)

The second partial derivative of interest earned for Case 1 with respect to  $W$  is

$$\frac{\partial^2 IE}{\partial W^2} = pI_e \frac{\alpha\beta(\beta-1)W^{\beta-2}}{m} \left[ \frac{m}{2} (M^2 - N^2) - \frac{(M^3 - N^3)}{6} \right] \quad (\text{A.18})$$

The first partial derivative of the interest earned for Case 1 with respect to  $B$  is

$$\frac{\partial IE}{\partial B} = 0 \quad (\text{A.19})$$

So, the second partial derivative is also zero.

The first partial derivative of the interest earned for Case 1 with respect  $T$  is

$$\frac{\partial IE}{\partial T} = 0 \quad (\text{A.20})$$

So, the second partial derivative is also zero.

Interest earned for Case 2

The first partial derivative of the interest earned for Case 2 with respect to  $W$  is

$$\frac{\partial IE}{\partial W} = pI_e \left[ \frac{\alpha\beta W^{\beta-1}}{m} \left\{ \frac{m}{2} (t_1^2 - N^2) - \frac{1}{6} (t_1^3 - N^3) \right\} + \frac{\alpha W^\beta}{m} \left\{ mt_1 \frac{\partial t_1}{\partial W} - \frac{t_1^2}{2} \frac{\partial t_1}{\partial W} \right\} \right. \\ \left. + \frac{\alpha\beta(W+B)^{\beta-1}}{2m} \left\{ \frac{m}{2} (M^2 - t_1^2) - \frac{1}{6} (M^3 - t_1^3) \right\} + \frac{\alpha(W+B)^\beta}{2m} \left\{ -mt_1 \frac{\partial t_1}{\partial W} + \frac{t_1^2}{2} \frac{\partial t_1}{\partial W} \right\} \right] \quad (\text{A.21})$$

The second partial derivative of interest earned for Case 2 with respect to  $W$  is

$$\frac{\partial^2 IE}{\partial W^2} = pI_e \left[ \frac{\alpha\beta(\beta-1)W^{\beta-2}}{m} \left\{ \frac{m}{2} (t_1^2 - N^2) - \frac{1}{6} (t_1^3 - N^3) \right\} + 2 \frac{\alpha\beta W^{\beta-1}}{m} \left\{ mt_1 \frac{\partial t_1}{\partial W} - \frac{t_1^2}{2} \frac{\partial t_1}{\partial W} \right\} \right. \\ \left. + \frac{\alpha W^\beta}{m} \left\{ m \left( \frac{\partial t_1}{\partial W} \right)^2 + mt_1 \frac{\partial^2 t_1}{\partial W^2} - t_1 \left( \frac{\partial t_1}{\partial W} \right)^2 - \frac{t_1^2}{2} \frac{\partial^2 t_1}{\partial W^2} \right\} \right. \\ \left. + \frac{\alpha\beta(\beta-1)(W+B)^{\beta-2}}{2m} \left\{ \frac{m}{2} (M^2 - t_1^2) - \frac{1}{6} (M^3 - t_1^3) \right\} + \frac{\alpha\beta(W+B)^{\beta-1}}{m} \left\{ -mt_1 \frac{\partial t_1}{\partial W} + \frac{t_1^2}{2} \frac{\partial t_1}{\partial W} \right\} \right. \\ \left. + \frac{\alpha(W+B)^\beta}{2m} \left\{ -m \left( \frac{\partial t_1}{\partial W} \right)^2 - mt_1 \frac{\partial^2 t_1}{\partial W^2} + t_1 \left( \frac{\partial t_1}{\partial W} \right)^2 + \frac{t_1^2}{2} \frac{\partial^2 t_1}{\partial W^2} \right\} \right] \quad (\text{A.22})$$

The first partial derivative of the interest earned for Case 2 with respect to  $B$  is

$$\frac{\partial IE}{\partial B} = pI_e \left[ \frac{\alpha W^\beta}{m} \left\{ mt_1 \frac{\partial t_1}{\partial B} - \frac{t_1^2}{2} \frac{\partial t_1}{\partial B} \right\} + \frac{\alpha\beta(W+B)^{\beta-1}}{2m} \left\{ \frac{m}{2} (M^2 - t_1^2) - \frac{1}{6} (M^3 - t_1^3) \right\} \right. \\ \left. + \frac{\alpha(W+B)^\beta}{2m} \left\{ -mt_1 \frac{\partial t_1}{\partial B} + \frac{t_1^2}{2} \frac{\partial t_1}{\partial B} \right\} \right] \quad (\text{A.23})$$

The second partial derivative of the interest earned for Case 2 with respect to  $B$  is

$$\frac{\partial^2 IE}{\partial B^2} = pI_e \left[ \frac{\alpha W^\beta}{m} \left\{ m \left( \frac{\partial t_1}{\partial B} \right)^2 + mt_1 \frac{\partial^2 t_1}{\partial B^2} - t_1 \left( \frac{\partial t_1}{\partial B} \right)^2 - \frac{t_1^2}{2} \frac{\partial^2 t_1}{\partial B^2} \right\} + \frac{\alpha\beta(\beta-1)(W+B)^{\beta-2}}{2m} \left\{ \frac{m}{2} (M^2 - t_1^2) - \frac{1}{6} (M^3 - t_1^3) \right\} \right. \\ \left. + \frac{\alpha\beta(W+B)^{\beta-1}}{m} \left\{ -mt_1 \frac{\partial t_1}{\partial B} + \frac{t_1^2}{2} \frac{\partial t_1}{\partial B} \right\} + \frac{\alpha(W+B)^\beta}{2m} \left\{ -m \left( \frac{\partial t_1}{\partial B} \right)^2 - mt_1 \frac{\partial^2 t_1}{\partial B^2} + t_1 \left( \frac{\partial t_1}{\partial B} \right)^2 + \frac{t_1^2}{2} \frac{\partial^2 t_1}{\partial B^2} \right\} \right] \quad (\text{A.24})$$

The first partial derivative of the interest earned for Case 2 with respect to  $T$  is

$$\frac{\partial IE}{\partial T} = pI_e \left[ \frac{\alpha W^\beta}{m} \left\{ mt_1 \frac{\partial t_1}{\partial T} - \frac{t_1^2}{2} \frac{\partial t_1}{\partial T} \right\} + \frac{\alpha(W+B)^\beta}{2m} \left\{ -mt_1 \frac{\partial t_1}{\partial T} + \frac{t_1^2}{2} \frac{\partial t_1}{\partial T} \right\} \right] \quad (\text{A.25})$$

The partial derivative of equation (A.25) with respect to  $T$  is

$$\frac{\partial^2 IE}{\partial T^2} = pI_e \left[ \frac{\alpha W^\beta}{m} \left\{ m \left( \frac{\partial t_1}{\partial T} \right)^2 + mt_1 \frac{\partial^2 t_1}{\partial T^2} - t_1 \left( \frac{\partial t_1}{\partial T} \right)^2 - \frac{t_1^2}{2} \frac{\partial^2 t_1}{\partial T^2} \right\} \right. \\ \left. + \frac{\alpha(W+B)^\beta}{2m} \left\{ -m \left( \frac{\partial t_1}{\partial T} \right)^2 - mt_1 \frac{\partial^2 t_1}{\partial T^2} + t_1 \left( \frac{\partial t_1}{\partial T} \right)^2 + \frac{t_1^2}{2} \frac{\partial^2 t_1}{\partial T^2} \right\} \right] \quad (\text{A.26})$$

Interest earned for Case 3

The first partial derivative of the interest earned for Case 3 with respect to  $W$  is

$$\frac{\partial IE}{\partial W} = pI_e \frac{\alpha\beta(W+B)^{\beta-1}}{2m} \left[ \frac{m}{2}(M^2 - N^2) - \frac{1}{6}(M^3 - N^3) \right] \quad (\text{A.27})$$

The second partial derivative of interest earned for Case 3 with respect to  $W$  is

$$\frac{\partial^2 IE}{\partial W^2} = pI_e \frac{\alpha\beta(\beta-1)(W+B)^{\beta-2}}{2m} \left[ \frac{m}{2}(M^2 - N^2) - \frac{1}{6}(M^3 - N^3) \right] \quad (\text{A.28})$$

The first partial derivative of the interest earned for Case 3 with respect to  $B$  is

$$\frac{\partial IE}{\partial B} = pI_e \frac{\alpha\beta(W+B)^{\beta-1}}{2m} \left[ \frac{m}{2}(M^2 - N^2) - \frac{1}{6}(M^3 - N^3) \right] \quad (\text{A.29})$$

The second partial derivative of interest earned for Case 3 with respect to  $B$  is

$$\frac{\partial^2 IE}{\partial B^2} = pI_e \frac{\alpha\beta(\beta-1)(W+B)^{\beta-2}}{2m} \left[ \frac{m}{2}(M^2 - N^2) - \frac{1}{6}(M^3 - N^3) \right] \quad (\text{A.30})$$

The first partial derivative of the interest earned for Case 3 with respect to  $T$  is

$$\frac{\partial IE}{\partial T} = 0 \quad (\text{A.31})$$

So, the second partial derivative of interest earned is zero.

Interest earned of Case 4

The first partial derivative of the interest earned for Case 4 with respect to  $W$  is

$$\frac{\partial IE}{\partial W} = pI_e \frac{\alpha\beta(W+B)^{\beta-1}}{2m} \left[ \frac{m}{2}(T^2 - N^2) - \frac{1}{6}(T^3 - N^3) \right] [M - T]$$

(A.32)

The second partial derivative of the interest earned for Case 4 with respect to  $W$  is

$$\frac{\partial^2 IE}{\partial W^2} = pI_e \frac{\alpha\beta(\beta-1)(W+B)^{\beta-2}}{2m} \left[ \frac{m}{2}(T^2 - N^2) - \frac{1}{6}(T^3 - N^3) \right] [M - T] \quad (\text{A.33})$$

The first partial derivative of the interest earned for Case 4 with respect to  $B$  is

$$\frac{\partial IE}{\partial B} = pI_e \frac{\alpha\beta(W+B)^{\beta-1}}{2m} \left[ \frac{m}{2}(T^2 - N^2) - \frac{1}{6}(T^3 - N^3) \right] [M - T] \quad (\text{A.34})$$

The second partial derivative of the interest earned for Case 4 with respect to  $B$  is

$$\frac{\partial^2 IE}{\partial B^2} = pI_e \frac{\alpha\beta(\beta-1)(W+B)^{\beta-2}}{2m} \left[ \frac{m}{2}(T^2 - N^2) - \frac{1}{6}(T^3 - N^3) \right] [M - T] \quad (\text{A.35})$$

The first partial derivative of the interest earned for Case 4 with respect to  $T$  is

$$\frac{\partial IE}{\partial T} = pI_e \frac{\alpha(W+B)^\beta}{2m} \left\{ mT - \frac{T^2}{2} \right\} [M - T] - pI_e \frac{\alpha(W+B)^\beta}{2m} \left[ \frac{m}{2}(T^2 - N^2) - \frac{1}{6}(T^3 - N^3) \right] \quad (\text{A.36})$$

The second partial derivative of the interest earned for Case 4 with respect to  $B$  is

$$\frac{\partial^2 IE}{\partial T^2} = pI_e \frac{\alpha(W+B)^\beta(m-T)}{2m} [M - T] - 2pI_e \frac{\alpha(W+B)^\beta}{2m} \left\{ mT - \frac{T^2}{2} \right\} \quad (\text{A.37})$$

Interest earned of Case 5

The first partial derivative of the interest earned for Case 5 with respect to  $W$  is

$$\frac{\partial IE}{\partial W} = pI_e(M - N) \frac{\partial Q}{\partial W} \quad (\text{A.38})$$

The second partial derivative of the interest earned for Case 5 with respect to  $W$  is

$$\frac{\partial^2 IE}{\partial W^2} = pI_e(M - N) \frac{\partial^2 Q}{\partial W^2} \quad (\text{A.39})$$

The first partial derivative of the interest earned for Case 5 with respect to  $B$  is

$$\frac{\partial IE}{\partial B} = pI_e(M - N) \left\{ \frac{\partial Q}{\partial B} - 1 \right\} \quad (\text{A.40})$$

The second partial derivative of the interest earned for Case 5 with respect to  $B$  is

$$\frac{\partial^2 IE}{\partial B^2} = pI_e(M - N) \frac{\partial^2 Q}{\partial B^2} \quad (\text{A.41})$$

The first partial derivative of the interest earned for Case 5 with respect to  $T$  is

$$\frac{\partial IE}{\partial T} = pI_e(M - N) \frac{\partial Q}{\partial T} \quad (\text{A.42})$$

The partial derivative of the interest earned for Case 5 with respect to  $B$  is

$$\frac{\partial^2 IE}{\partial T^2} = pI_e(M - N) \frac{\partial^2 Q}{\partial T^2} \quad (\text{A.43})$$

Interest paid of Case 1

The first partial derivative of the interest paid for Case 1 with respect to  $W$  is

$$\frac{\partial IP}{\partial W} = cI_p \left[ \frac{\alpha\beta W^{\beta-1}}{6m} (t_1^3 - M^3) + \frac{\alpha W^\beta}{2m} t_1^2 \frac{\partial t_1}{\partial W} - \frac{\alpha\beta W^{\beta-1}}{2} (t_1^2 - M^2) - \alpha W^\beta t_1 \frac{\partial t_1}{\partial W} \right. \\ \left. + \frac{\partial Q}{\partial W} (t_1 - M) + Q \frac{\partial t_1}{\partial W} + \frac{(T - t_1)}{2} - \frac{(W + B)}{2} \frac{\partial t_1}{\partial W} \right] \quad (\text{A.44})$$

The second partial derivative of interest paid for Case 1 with respect to  $W$  is

$$\frac{\partial^2 IP}{\partial W^2} = cI_p \left[ \frac{\alpha\beta(\beta-1)W^{\beta-2}}{6m} (t_1^3 - M^3) + \frac{\alpha\beta W^{\beta-1}}{6m} t_1^2 \frac{\partial t_1}{\partial W} + \frac{\alpha\beta W^{\beta-1}}{2m} t_1^2 \frac{\partial t_1}{\partial W} + \frac{\alpha W^\beta}{m} t_1 \left( \frac{\partial t_1}{\partial W} \right)^2 \right. \\ \left. + \frac{\alpha W^\beta}{2m} t_1^2 \frac{\partial^2 t_1}{\partial W^2} - \frac{\alpha\beta(\beta-1)W^{\beta-2}}{2} (t_1^2 - M^2) - \alpha\beta W^{\beta-1} t_1 \frac{\partial t_1}{\partial W} - \alpha\beta W^{\beta-1} t_1 \frac{\partial t_1}{\partial W} \right. \\ \left. - \alpha W^\beta \left( \frac{\partial t_1}{\partial W} \right)^2 - \alpha W^\beta t_1 \frac{\partial^2 t_1}{\partial W^2} + \frac{\partial^2 Q}{\partial W^2} (t_1 - M) + 2 \frac{\partial Q}{\partial W} \frac{\partial t_1}{\partial W} + Q \frac{\partial^2 t_1}{\partial W^2} - \frac{\partial t_1}{\partial W} - \frac{(W + B)}{2} \frac{\partial^2 t_1}{\partial W^2} \right] \quad (\text{A.45})$$

The first partial derivative of the interest paid for Case 1 with respect to  $B$  is

$$\frac{\partial IP}{\partial B} = cI_p \left[ \frac{\alpha W^\beta}{2m} t_1^2 \frac{\partial t_1}{\partial B} - \alpha W^\beta t_1 \frac{\partial t_1}{\partial B} + \frac{\partial Q}{\partial B} (t_1 - M) + Q \frac{\partial t_1}{\partial B} + \frac{(T - t_1)}{2} - \frac{(W + B)}{2} \frac{\partial t_1}{\partial B} \right] \quad (\text{A.46})$$

The second partial derivative of interest paid for Case 1 with respect to  $B$  is

$$\frac{\partial^2 IP}{\partial B^2} = cI_p \left[ \frac{\alpha W^\beta}{m} t_1 \frac{\partial t_1}{\partial B} + \frac{\alpha W^\beta}{2m} t_1^2 \frac{\partial^2 t_1}{\partial B^2} - \alpha W^\beta \left( \frac{\partial t_1}{\partial B} \right)^2 - \alpha W^\beta t_1 \frac{\partial^2 t_1}{\partial B^2} + \frac{\partial^2 Q}{\partial B^2} (t_1 - M) \right. \\ \left. + 2 \frac{\partial Q}{\partial B} \frac{\partial t_1}{\partial B} + Q \frac{\partial^2 t_1}{\partial B^2} - \frac{\partial t_1}{\partial B} - \frac{(W+B)}{2} \frac{\partial^2 t_1}{\partial B^2} \right] \quad (\text{A.47})$$

The first partial derivative of the interest paid for Case 1 with respect to  $T$  is

$$\frac{\partial IP}{\partial T} = cI_p \left[ \frac{\alpha W^\beta}{2m} t_1^2 \frac{\partial t_1}{\partial T} - \alpha W^\beta t_1 \frac{\partial t_1}{\partial T} + \frac{\partial Q}{\partial T} (t_1 - M) + Q \frac{\partial t_1}{\partial T} + \frac{(W+B)}{2} \left\{ 1 - \frac{\partial t_1}{\partial T} \right\} \right] \quad (\text{A.48})$$

The second partial derivative of interest paid for Case 1 with respect to  $T$  is

$$\frac{\partial^2 IP}{\partial T^2} = cI_p \left[ \frac{\alpha W^\beta}{m} t_1 \frac{\partial t_1}{\partial T} + \frac{\alpha W^\beta}{2m} t_1^2 \frac{\partial^2 t_1}{\partial T^2} - \alpha W^\beta \left( \frac{\partial t_1}{\partial T} \right)^2 - \alpha W^\beta t_1 \frac{\partial^2 t_1}{\partial T^2} + \frac{\partial^2 Q}{\partial T^2} (t_1 - M) \right. \\ \left. + 2 \frac{\partial Q}{\partial T} \frac{\partial t_1}{\partial T} + Q \frac{\partial^2 t_1}{\partial T^2} - \frac{(W+B)}{2} \frac{\partial^2 t_1}{\partial T^2} \right] \quad (\text{A.49})$$

Interest paid for Case 2

The first partial derivative of the interest paid for Case 2 with respect to  $W$  is

$$\frac{\partial IP}{\partial W} = cI_p \frac{(T-M)}{2} \quad (\text{A.50})$$

The second partial derivative of the interest paid for Case 2 with respect to  $W$  is

$$\frac{\partial^2 IP}{\partial W^2} = 0 \quad (\text{A.51})$$

The first partial derivative of the interest paid for Case 2 with respect to  $B$  is

$$\frac{\partial IP}{\partial B} = cI_p \frac{(T-M)}{2} \quad (\text{A.52})$$

The second partial derivative of the interest paid for Case 2 with respect to  $B$  is

$$\frac{\partial^2 IP}{\partial B^2} = 0 \quad (\text{A.53})$$

The first partial derivative of the interest paid for Case 2 with respect to  $T$  is

$$\frac{\partial IP}{\partial T} = cI_p \frac{(W+B)}{2} \quad (\text{A.54})$$

The partial derivative of the interest paid for Case 2 with respect to  $T$  is

$$\frac{\partial^2 IP}{\partial T^2} = 0 \quad (\text{A.55})$$

Interest paid of Case 3

For the Case 3, all the expressions are similar to Case 2.

Interest paid of Case 4 and Case 5.

There is not interest paid.

For shortage ( $B < 0$ )

$$Q = W + \frac{\alpha W^\beta}{2m} (2mt_1 - t_1^2) \geq W$$

Using the continuity of equations (24) and (25), it is determined

$$\frac{1}{2m} \alpha W^\beta t_1^2 - \alpha W^\beta t_1 + Q = \left[ \frac{\alpha(1-\beta)}{2m} \{t_1^2 + 2m(t_2 - t_1) - t_2^2\} \right]^{\frac{1}{1-\beta}} \quad (\text{A.56})$$

By using equation (27), it is obtained

$$W = \left[ \frac{\alpha(1-\beta)}{2m} \{t_1^2 + 2m(t_2 - t_1) - t_2^2\} \right]^{\frac{1}{1-\beta}} \quad (\text{A.57})$$

Solving equation (A.57) for  $t_1$ ,

$$\begin{aligned} \frac{\alpha(1-\beta)}{2m} \{t_1^2 + 2m(t_2 - t_1) - t_2^2\} &= W^{1-\beta} \\ \{t_1^2 + 2m(t_2 - t_1) - t_2^2\} &= \frac{2mW^{1-\beta}}{\alpha(1-\beta)} \\ \{t_1^2 - 2mt_1 + m^2 - m^2 + 2mt_2 - t_2^2\} &= \frac{2mW^{1-\beta}}{\alpha(1-\beta)} \\ \{(t_1 - m)^2 - (t_2 - m)^2\} &= \frac{2mW^{1-\beta}}{\alpha(1-\beta)} \\ (t_1 - m)^2 &= (t_2 - m)^2 + \frac{2mW^{1-\beta}}{\alpha(1-\beta)} \\ t_1 &= m \pm \sqrt{(m - t_2)^2 + \frac{2mW^{1-\beta}}{\alpha(1-\beta)}} \geq 0 \end{aligned}$$

It is only considered the following value of  $t_1$ ,

$$t_1 = m - \sqrt{(m - t_2)^2 + \frac{2mW^{1-\beta}}{\alpha(1-\beta)}} \geq 0 \quad (\text{A.58})$$

Substitute the value of  $t_2$  into equation (A.58), hence

$$t_1 = m - \sqrt{\left(m - T + \frac{B}{\alpha\delta}\right)^2 + \frac{2mW^{1-\beta}}{\alpha(1-\beta)}} \geq 0 \quad (\text{A.59})$$

The initial stock  $Q$  is

$$Q = W + \frac{\alpha W^\beta}{2m} \left[ m^2 - \left(m - T + \frac{B}{\alpha\delta}\right)^2 - \frac{2mW^{1-\beta}}{\alpha(1-\beta)} \right] \quad (\text{A.60})$$

The first partial derivative of equation (A.60) with respect to  $B$  is

$$\frac{\partial Q}{\partial B} = -\frac{W^\beta}{\delta m} \left(m - T + \frac{B}{\alpha\delta}\right) < 0 \quad (\text{A.61})$$

The second partial derivative of equation (A.60) with respect to  $B$  is



$$\frac{\partial^2 Q}{\partial B^2} = -\frac{W^\beta}{\alpha \delta^2 m} < 0 \quad (\text{A.62})$$

The cross partial derivative of equation (A.61) with respect to  $W$  is

$$\frac{\partial^2 Q}{\partial B \partial W} = -\frac{\beta W^{\beta-1}}{\delta m} \left( m - T + \frac{B}{\alpha \delta} \right) < 0 \quad (\text{A.63})$$

The first partial derivative of (A.60) with respect to  $W$  is

$$\begin{aligned} \frac{\partial Q}{\partial W} &= \frac{\alpha \beta W^{\beta-1}}{2m} \left[ m^2 - \left( m - T + \frac{B}{\alpha \delta} \right)^2 - \frac{2mW^{1-\beta}}{\alpha(1-\beta)} \right] \\ \frac{\partial Q}{\partial W} &= \frac{\beta(Q-W)}{W} > 0 \end{aligned}$$

(A.64)

The second partial derivative of equation (A.60) with respect to  $W$  is

$$\frac{\partial^2 Q}{\partial W^2} = \frac{-\beta W \left( \frac{\beta(Q-W)}{W} - 1 \right) - \beta(Q-W)}{W^2} < 0 \quad (\text{A.65})$$

The first partial derivative of the holding cost with respect to  $B$  is

$$\frac{\partial chol}{\partial B} = h \left( \frac{\partial chol_1}{\partial B} + \frac{\partial chol_2}{\partial B} \right) \quad (\text{A.66})$$

The second partial derivative of the holding cost with respect to  $B$  is

$$\frac{\partial^2 chol}{\partial B^2} = h \left( \frac{\partial^2 chol_1}{\partial B^2} + \frac{\partial^2 chol_2}{\partial B^2} \right) \quad (\text{A.67})$$

The expressions of the first and second derivatives for  $chol_1$  and  $chol_2$  with respect to  $B$  are given below.

$$\begin{aligned} \frac{\partial chol_1}{\partial B} &= \frac{\partial Q}{\partial B} t_1 + Q \frac{\partial t_1}{\partial B} + \frac{\alpha W^\beta t_1^2}{2m} \frac{\partial t_1}{\partial B} - \alpha W^\beta t_1 \frac{\partial t_1}{\partial B} \\ \frac{\partial chol_2}{\partial B} &= \frac{W \left( \frac{\partial t_2}{\partial B} - \frac{\partial t_1}{\partial B} \right)}{2} \\ \frac{\partial^2 chol_1}{\partial B^2} &= \frac{\partial^2 Q}{\partial B^2} t_1 + 2 \frac{\partial Q}{\partial B} \frac{\partial t_1}{\partial B} + Q \frac{\partial^2 t_1}{\partial B^2} + \frac{\alpha W^\beta t_1}{m} \left( \frac{\partial t_1}{\partial B} \right)^2 + \frac{\alpha W^\beta t_1^2}{2m} \frac{\partial^2 t_1}{\partial B^2} - \alpha W^\beta \left( \frac{\partial t_1}{\partial B} \right)^2 - \alpha W^\beta \frac{\partial^2 t_1}{\partial B^2} \\ \frac{\partial^2 chol_2}{\partial B^2} &= \frac{W \left( \frac{\partial^2 t_2}{\partial B^2} - \frac{\partial^2 t_1}{\partial B^2} \right)}{2} \end{aligned}$$

The first partial derivative of the holding cost with respect to  $W$  is

$$\frac{\partial chol}{\partial W} = h \left( \frac{\partial chol_1}{\partial W} + \frac{\partial chol_2}{\partial W} \right) \quad (\text{A.68})$$

The second partial derivative of the holding cost with respect to  $W$  is

$$\frac{\partial^2 chol}{\partial W^2} = h \left( \frac{\partial^2 chol_1}{\partial W^2} + \frac{\partial^2 chol_2}{\partial W^2} \right) \quad (\text{A.69})$$

The expressions of the first and second derivatives for  $chol_1$  and  $chol_2$  with respect to  $W$  are given bellow

$$\begin{aligned}\frac{\partial chol_1}{\partial W} &= \frac{\partial Q}{\partial W} t_1 + Q \frac{\partial t_1}{\partial W} + \frac{\alpha \beta W^{\beta-1} t_1^3}{6m} + \frac{\alpha W^{\beta} t_1^2}{2m} \frac{\partial t_1}{\partial W} - \frac{\alpha \beta W^{\beta-1} t_1^2}{2} - \alpha W^{\beta} t_1 \frac{\partial t_1}{\partial W} \\ \frac{\partial chol_2}{\partial W} &= \frac{(t_2 - t_1)}{2} - \frac{W}{2} \left( \frac{\partial t_2}{\partial W} - \frac{\partial t_1}{\partial W} \right) \\ \frac{\partial^2 chol_1}{\partial W^2} &= \frac{\partial^2 Q}{\partial W^2} t_1 + 2 \frac{\partial Q}{\partial W} \frac{\partial t_1}{\partial W} + Q \frac{\partial^2 t_1}{\partial W^2} + \frac{\alpha \beta (\beta-1) W^{\beta-2} t_1^3}{6m} + \frac{\alpha \beta W^{\beta-1} t_1^2}{2m} \frac{\partial t_1}{\partial W} + \frac{\alpha \beta W^{\beta-1} t_1^2}{2m} \frac{\partial t_1}{\partial W} \\ &\quad + \frac{\alpha W^{\beta} t_1}{m} \left( \frac{\partial t_1}{\partial W} \right)^2 + \frac{\alpha W^{\beta} t_1^2}{2m} \frac{\partial^2 t_1}{\partial W^2} - \frac{\alpha \beta (\beta-1) W^{\beta-2} t_1^2}{2} - \alpha \beta W^{\beta-1} t_1 \frac{\partial t_1}{\partial W} - \alpha \beta W^{\beta-1} t_1 \frac{\partial t_1}{\partial W} \\ &\quad - \alpha W^{\beta} \left( \frac{\partial t_1}{\partial W} \right)^2 - \alpha W^{\beta} t_1 \frac{\partial^2 t_1}{\partial W^2} \\ \frac{\partial^2 chol_2}{\partial W^2} &= \frac{1}{2} \left( \frac{\partial t_2}{\partial W} - \frac{\partial t_1}{\partial W} \right) - \frac{1}{2} \left( \frac{\partial t_2}{\partial W} - \frac{\partial t_1}{\partial W} \right) - \frac{W}{2} \left( \frac{\partial^2 t_2}{\partial W^2} - \frac{\partial^2 t_1}{\partial W^2} \right) \\ \frac{\partial^2 chol_2}{\partial W^2} &= -\frac{W}{2} \left( \frac{\partial^2 t_2}{\partial W^2} - \frac{\partial^2 t_1}{\partial W^2} \right)\end{aligned}$$

The first partial derivative of the holding cost with respect to  $T$  is

$$\frac{\partial chol}{\partial T} = h \left( \frac{\partial chol_1}{\partial T} + \frac{\partial chol_2}{\partial T} \right) \quad (A.70)$$

The second partial derivative of the holding cost with respect to  $T$  is

$$\frac{\partial^2 chol}{\partial T^2} = h \left( \frac{\partial^2 chol_1}{\partial T^2} + \frac{\partial^2 chol_2}{\partial T^2} \right) \quad (A.71)$$

The expressions of the first and second derivatives for  $chol_1$  and  $chol_2$  with respect to  $T$  are given bellow

$$\begin{aligned}\frac{\partial chol_1}{\partial T} &= \frac{\partial Q}{\partial T} t_1 + Q \frac{\partial t_1}{\partial T} + \frac{\alpha W^{\beta} t_1^2}{2m} \frac{\partial t_1}{\partial T} - \alpha W^{\beta} t_1 \frac{\partial t_1}{\partial T} \\ \frac{\partial chol_2}{\partial T} &= \frac{W}{2} \left\{ \frac{\partial t_2}{\partial T} - \frac{\partial t_1}{\partial T} \right\} \\ \frac{\partial^2 chol_1}{\partial T^2} &= \frac{\partial^2 Q}{\partial T^2} t_1 + 2 \frac{\partial Q}{\partial T} \frac{\partial t_1}{\partial T} + Q \frac{\partial^2 t_1}{\partial T^2} + \frac{\alpha W^{\beta} t_1}{m} \left( \frac{\partial t_1}{\partial T} \right)^2 + \frac{\alpha W^{\beta} t_1^2}{2m} \frac{\partial^2 t_1}{\partial T^2} - \alpha W^{\beta} \left( \frac{\partial t_1}{\partial T} \right)^2 - \alpha W^{\beta} \frac{\partial^2 t_1}{\partial T^2} \\ \frac{\partial^2 chol_2}{\partial T^2} &= \frac{W}{2} \left\{ \frac{\partial^2 t_2}{\partial T^2} - \frac{\partial^2 t_1}{\partial T^2} \right\}\end{aligned}$$

The first partial derivatives of the shortage cost with respect to  $W$  and  $T$  are

$$\frac{\partial csho}{\partial W} = 0 \text{ and } \frac{\partial csho}{\partial T} = 0 \quad (A.72)$$

So, the second partial derivatives with respect to  $W$  and  $T$  are also zero.

The first partial derivative of the shortage cost with respect to  $B$  is

$$\frac{\partial csho}{\partial B} = \frac{c_b B}{\delta \alpha} \quad (A.73)$$

The second partial derivative of the shortage cost with respect to  $B$  is

$$\frac{\partial^2 csho}{\partial B^2} = \frac{c_b}{\delta \alpha} \quad (\text{A.74})$$

The first partial derivatives of the lost sale cost with respect to  $W$  and  $T$  are

$$\frac{\partial ocsls}{\partial W} = 0 \text{ and } \frac{\partial ocsls}{\partial T} = 0 \quad (\text{A.75})$$

So, the second partial derivatives with respect to  $W$  and  $T$  are also zero.

The first partial derivative of the lost sale cost with respect to  $B$  is

$$\frac{\partial ocsls}{\partial B} = \frac{c_l(1-\delta)}{\delta} \quad (\text{A.76})$$

The second partial derivative of the lost sale cost with respect to  $B$  is

$$\frac{\partial^2 ocsls}{\partial B^2} = 0 \quad (\text{A.77})$$

Interest earned for Case 6

The details derivation of interest earned for Case 6 is similar as without shortage case.

Interest earned for Case 7

The first partial derivative of the interest earned for Case 7 with respect to  $W$  is

$$\frac{\partial IE}{\partial W} = pI_e \left[ \frac{\alpha \beta W^{\beta-1}}{m} \left\{ \frac{m}{2} (t_1^2 - N^2) - \frac{1}{6} (t_1^3 - N^3) \right\} + \frac{\alpha W^\beta}{m} \left\{ m t_1 \frac{\partial t_1}{\partial W} - \frac{t_1^2}{2} \frac{\partial t_1}{\partial W} \right\} \right. \\ \left. + \frac{\alpha \beta (W)^{\beta-1}}{2m} \left\{ \frac{m}{2} (M^2 - t_1^2) - \frac{1}{6} (M^3 - t_1^3) \right\} + \frac{\alpha (W)^\beta}{2m} \left\{ -m t_1 \frac{\partial t_1}{\partial W} + \frac{t_1^2}{2} \frac{\partial t_1}{\partial W} \right\} \right] \quad (\text{A.78})$$

The second partial derivative of interest earned for Case 7 with respect to  $W$  is

$$\frac{\partial^2 IE}{\partial W^2} = pI_e \left[ \frac{\alpha \beta (\beta-1) W^{\beta-2}}{m} \left\{ \frac{m}{2} (t_1^2 - N^2) - \frac{1}{6} (t_1^3 - N^3) \right\} + 2 \frac{\alpha \beta W^{\beta-1}}{m} \left\{ m t_1 \frac{\partial t_1}{\partial W} - \frac{t_1^2}{2} \frac{\partial t_1}{\partial W} \right\} \right. \\ + \frac{\alpha W^\beta}{m} \left\{ m \left( \frac{\partial t_1}{\partial W} \right)^2 + m t_1 \frac{\partial^2 t_1}{\partial W^2} - t_1 \left( \frac{\partial t_1}{\partial W} \right)^2 - \frac{t_1^2}{2} \frac{\partial^2 t_1}{\partial W^2} \right\} \\ \left. + \frac{\alpha \beta (\beta-1) (W)^{\beta-2}}{2m} \left\{ \frac{m}{2} (M^2 - t_1^2) - \frac{1}{6} (M^3 - t_1^3) \right\} + \frac{\alpha \beta (W)^{\beta-1}}{m} \left\{ -m t_1 \frac{\partial t_1}{\partial W} + \frac{t_1^2}{2} \frac{\partial t_1}{\partial W} \right\} \right. \\ \left. + \frac{\alpha (W)^\beta}{2m} \left\{ -m \left( \frac{\partial t_1}{\partial W} \right)^2 - m t_1 \frac{\partial^2 t_1}{\partial W^2} + t_1 \left( \frac{\partial t_1}{\partial W} \right)^2 + \frac{t_1^2}{2} \frac{\partial^2 t_1}{\partial W^2} \right\} \right] \quad (\text{A.79})$$

The first partial derivative of the interest earned for Case 7 with respect to  $B$  is

$$\frac{\partial IE}{\partial B} = pI_e \left[ \frac{\alpha W^\beta}{m} \left\{ m t_1 \frac{\partial t_1}{\partial B} - \frac{t_1^2}{2} \frac{\partial t_1}{\partial B} \right\} + \frac{\alpha (W)^\beta}{2m} \left\{ -m t_1 \frac{\partial t_1}{\partial B} + \frac{t_1^2}{2} \frac{\partial t_1}{\partial B} \right\} \right] \quad (\text{A.80})$$

The second partial derivative of the interest earned for Case 7 with respect to  $B$  is

$$\frac{\partial^2 IE}{\partial B^2} = pI_e \left[ \frac{\alpha W^\beta}{m} \left\{ m \left( \frac{\partial t_1}{\partial B} \right)^2 + m t_1 \frac{\partial^2 t_1}{\partial B^2} - t_1 \left( \frac{\partial t_1}{\partial B} \right)^2 - \frac{t_1^2}{2} \frac{\partial^2 t_1}{\partial B^2} \right\} + \frac{\alpha (W+B)^\beta}{2m} \left\{ -m \left( \frac{\partial t_1}{\partial B} \right)^2 - m t_1 \frac{\partial^2 t_1}{\partial B^2} + t_1 \left( \frac{\partial t_1}{\partial B} \right)^2 + \frac{t_1^2}{2} \frac{\partial^2 t_1}{\partial B^2} \right\} \right]$$

(A.81)

The first partial derivative of the interest earned for Case 7 with respect to  $T$  is

$$\frac{\partial IE}{\partial T} = pI_e \left[ \frac{\alpha W^\beta}{m} \left\{ m t_1 \frac{\partial t_1}{\partial T} - \frac{t_1^2}{2} \frac{\partial t_1}{\partial T} \right\} + \frac{\alpha (W)^\beta}{2m} \left\{ -m t_1 \frac{\partial t_1}{\partial T} + \frac{t_1^2}{2} \frac{\partial t_1}{\partial T} \right\} \right] \quad (A.82)$$

The second partial derivative of the interest earned for Case 7 with respect to  $B$  is

$$\frac{\partial^2 IE}{\partial T^2} = pI_e \left[ \frac{\alpha W^\beta}{m} \left\{ m \left( \frac{\partial t_1}{\partial T} \right)^2 + m t_1 \frac{\partial^2 t_1}{\partial T^2} - t_1 \left( \frac{\partial t_1}{\partial T} \right)^2 - \frac{t_1^2}{2} \frac{\partial^2 t_1}{\partial T^2} \right\} + \frac{\alpha (W)^\beta}{2m} \left\{ -m \left( \frac{\partial t_1}{\partial T} \right)^2 - m t_1 \frac{\partial^2 t_1}{\partial T^2} + t_1 \left( \frac{\partial t_1}{\partial T} \right)^2 + \frac{t_1^2}{2} \frac{\partial^2 t_1}{\partial T^2} \right\} \right] \quad (A.83)$$

Interest earned for Case 8

The first partial derivative of the interest earned for case-3 with respect to  $W$  is

$$\frac{\partial IE}{\partial W} = pI_e \frac{\alpha \beta (W)^{\beta-1}}{2m} \left[ \frac{m}{2} (M^2 - N^2) - \frac{1}{6} (M^3 - N^3) \right] \quad (A.84)$$

The second partial derivative of the interest earned for Case 8 with respect to  $W$  is

$$\frac{\partial^2 IE}{\partial W^2} = pI_e \frac{\alpha \beta (\beta-1) (W)^{\beta-2}}{2m} \left[ \frac{m}{2} (M^2 - N^2) - \frac{1}{6} (M^3 - N^3) \right] \quad (A.85)$$

The first partial derivative of the interest earned for Case 8 with respect to  $B$  is

$$\frac{\partial IE}{\partial B} = 0 \quad (A.86)$$

So, the second partial derivative is zero.

The first partial derivative of the interest earned for Case 8 with respect to  $T$  is

$$\frac{\partial IE}{\partial T} = 0 \quad (A.87)$$

So, the second partial derivative of interest earned is equal to 0.

Interest earned of Case 9

The partial derivative of the interest earned for Case 9 with respect to  $W$  is

$$\frac{\partial IE}{\partial W} = pI_e \frac{\alpha \beta (W)^{\beta-1}}{2m} \left[ \frac{m}{2} (t_2^2 - N^2) - \frac{1}{6} (t_2^3 - N^3) \right] [M - t_2] \quad (A.88)$$

The second partial derivative of the interest earned for Case 9 with respect to  $W$  is

$$\frac{\partial^2 IE}{\partial W^2} = pI_e \frac{\alpha \beta (\beta-1) (W)^{\beta-2}}{2m} \left[ \frac{m}{2} (t_2^2 - N^2) - \frac{1}{6} (t_2^3 - N^3) \right] [M - t_2] \quad (A.89)$$

The first partial derivative of the interest earned for Case 9 with respect to  $B$  is

$$\frac{\partial IE}{\partial B} = \left[ pI_e \frac{\alpha W^\beta}{2m} \left\{ mt_2 \frac{\partial t_2}{\partial B} - \frac{t_2^2}{2} \frac{\partial t_2}{\partial B} \right\} [M - t_2] - pI_e \frac{\alpha W^\beta}{2m} \left\{ \frac{m}{2} (t_2^2 - N^2) - \frac{1}{6} (t_2^3 - N^3) \right\} \frac{\partial t_2}{\partial B} \right] \quad (A.90)$$

The second partial derivative of the the interest earned for Case 9 with respect to  $B$  is

$$\frac{\partial^2 IE}{\partial B^2} = \left[ pI_e \frac{\alpha W^\beta}{2m} \left\{ m \left( \frac{\partial t_2}{\partial B} \right)^2 + mt_2 \frac{\partial^2 t_2}{\partial B^2} - t_2 \left( \frac{\partial t_2}{\partial B} \right)^2 \frac{t_2^2}{2} \frac{\partial^2 t_2}{\partial B^2} \right\} [M - t_2] \right. \\ \left. - 2pI_e \frac{\alpha W^\beta}{2m} \left\{ mt_2 \frac{\partial t_2}{\partial B} - \frac{t_2^2}{2} \frac{\partial t_2}{\partial B} \right\} \frac{\partial t_2}{\partial B} - pI_e \frac{\alpha W^\beta}{2m} \left\{ \frac{m}{2} (t_2^2 - N^2) - \frac{1}{6} (t_2^3 - N^3) \right\} \frac{\partial^2 t_2}{\partial B^2} \right] \quad (A.91)$$

The partial derivative of the interest earn for Case 9 with respect to  $T$  is

$$\frac{\partial IE}{\partial T} = \left[ pI_e \frac{\alpha W^\beta}{2m} \left\{ mt_2 \frac{\partial t_2}{\partial T} - \frac{t_2^2}{2} \frac{\partial t_2}{\partial T} \right\} [M - t_2] - pI_e \frac{\alpha W^\beta}{2m} \left\{ \frac{m}{2} (t_2^2 - N^2) - \frac{1}{6} (t_2^3 - N^3) \right\} \frac{\partial t_2}{\partial T} \right] \quad (A.92)$$

The partial derivative of the equation (A.92) with respect to  $B$  is

$$\frac{\partial^2 IE}{\partial T^2} = \left[ pI_e \frac{\alpha W^\beta}{2m} \left\{ m \left( \frac{\partial t_2}{\partial T} \right)^2 + mt_2 \frac{\partial^2 t_2}{\partial T^2} - t_2 \left( \frac{\partial t_2}{\partial T} \right)^2 \frac{t_2^2}{2} \frac{\partial^2 t_2}{\partial T^2} \right\} [M - t_2] \right. \\ \left. - 2pI_e \frac{\alpha W^\beta}{2m} \left\{ mt_2 \frac{\partial t_2}{\partial T} - \frac{t_2^2}{2} \frac{\partial t_2}{\partial T} \right\} \frac{\partial t_2}{\partial T} - pI_e \frac{\alpha W^\beta}{2m} \left\{ \frac{m}{2} (t_2^2 - N^2) - \frac{1}{6} (t_2^3 - N^3) \right\} \frac{\partial^2 t_2}{\partial T^2} \right] \quad (A.93)$$

Interest earned of Case 10

The first partial derivative of the interest earned for Case 10 with respect to  $W$  is

$$\frac{\partial IE}{\partial W} = pI_e (M - N) \frac{\partial Q}{\partial W} \quad (A.94)$$

The second partial derivative of the interest earned for Case 10 with respect to  $W$  is

$$\frac{\partial^2 IE}{\partial W^2} = pI_e (M - N) \frac{\partial^2 Q}{\partial W^2} \quad (A.95)$$

The first partial derivative of the interest earned for Case 10 with respect to  $B$  is

$$\frac{\partial IE}{\partial B} = pI_e (M - N) \frac{\partial Q}{\partial B} \quad (A.96)$$

The second partial derivative of the interest earned for Case 10 with respect to  $B$  is

$$\frac{\partial^2 IE}{\partial B^2} = pI_e (M - N) \frac{\partial^2 Q}{\partial B^2} \quad (A.97)$$

The first partial derivative of the interest earned for Case 10 with respect to  $T$  is

$$\frac{\partial IE}{\partial T} = pI_e (M - N) \frac{\partial Q}{\partial T} \quad (A.98)$$

The partial derivative of the equation (A.98) with respect to  $B$  is

$$\frac{\partial^2 IE}{\partial T^2} = pI_e (M - N) \frac{\partial^2 Q}{\partial T^2} \quad (A.99)$$

Interest paid of Case 6

The first partial derivative of the interest paid for Case 6 with respect to  $W$  is

$$\frac{\partial IP}{\partial W} = cI_p \left[ \frac{\alpha\beta W^{\beta-1}}{6m} (t_1^3 - M^3) + \frac{\alpha W^\beta}{2m} t_1^2 \frac{\partial t_1}{\partial W} - \frac{\alpha\beta W^{\beta-1}}{2} (t_1^2 - M^2) - \alpha W^\beta t_1 \frac{\partial t_1}{\partial W} \right. \\ \left. + \frac{\partial Q}{\partial W} (t_1 - M) + Q \frac{\partial t_1}{\partial W} + \frac{(t_2 - t_1)}{2} - \frac{W}{2} \left( \frac{\partial t_2}{\partial W} - \frac{\partial t_1}{\partial W} \right) \right] \quad (A.100)$$

The second partial derivative of interest paid for Case 6 with respect to  $W$  is

$$\frac{\partial^2 IP}{\partial W^2} = cI_p \left[ \frac{\alpha\beta(\beta-1)W^{\beta-2}}{6m} (t_1^3 - M^3) + \frac{\alpha\beta W^{\beta-1}}{6m} t_1^2 \frac{\partial t_1}{\partial W} + \frac{\alpha\beta W^{\beta-1}}{2m} t_1^2 \frac{\partial t_1}{\partial W} + \frac{\alpha W^\beta}{m} t_1 \left( \frac{\partial t_1}{\partial W} \right)^2 \right. \\ \left. + \frac{\alpha W^\beta}{2m} t_1^2 \frac{\partial^2 t_1}{\partial W^2} - \frac{\alpha\beta(\beta-1)W^{\beta-2}}{2} (t_1^2 - M^2) - \alpha\beta W^{\beta-1} t_1 \frac{\partial t_1}{\partial W} - \alpha\beta W^{\beta-1} t_1 \frac{\partial t_1}{\partial W} \right. \\ \left. - \alpha W^\beta \left( \frac{\partial t_1}{\partial W} \right)^2 - \alpha W^\beta t_1 \frac{\partial^2 t_1}{\partial W^2} + \frac{\partial^2 Q}{\partial W^2} (t_1 - M) + 2 \frac{\partial Q}{\partial W} \frac{\partial t_1}{\partial W} + Q \frac{\partial^2 t_1}{\partial W^2} - \left( \frac{\partial t_2}{\partial W} - \frac{\partial t_1}{\partial W} \right) \right. \\ \left. - \frac{W}{2} \left( \frac{\partial^2 t_2}{\partial W^2} - \frac{\partial^2 t_1}{\partial W^2} \right) \right] \quad (A.101)$$

The first partial derivative of the interest paid for Case 6 with respect to  $B$  is

$$\frac{\partial IP}{\partial B} = cI_p \left[ \left\{ \frac{\alpha W^\beta}{2m} t_1^2 \frac{\partial t_1}{\partial B} - \alpha W^\beta t_1 \frac{\partial t_1}{\partial B} + \frac{\partial Q}{\partial B} (t_1 - M) + Q \frac{\partial t_1}{\partial B} - \frac{W}{2} \left( \frac{\partial t_2}{\partial B} - \frac{\partial t_1}{\partial B} \right) \right\} (T - t_2) \right. \\ \left. - \left\{ \frac{\alpha W^\beta}{6m} (t_1^3 - M^3) - \frac{\alpha W^\beta}{2} (t_1^2 - M^2) + Q(t_1 - M) + \frac{W(t_2 - t_1)}{2} \right\} \frac{\partial t_2}{\partial B} \right] \quad (A.102)$$

The second partial derivative of interest paid for Case 6 with respect to  $B$  is

$$\frac{\partial^2 IP}{\partial B^2} = cI_p \left[ \left\{ \frac{\alpha W^\beta}{m} t_1 \frac{\partial t_1}{\partial B} + \frac{\alpha W^\beta}{2m} t_1^2 \frac{\partial^2 t_1}{\partial B^2} - \alpha W^\beta \left( \frac{\partial t_1}{\partial B} \right)^2 - \alpha W^\beta t_1 \frac{\partial^2 t_1}{\partial B^2} + \frac{\partial^2 Q}{\partial B^2} (t_1 - M) \right\} (T - t_2) \right. \\ \left. + 2 \frac{\partial Q}{\partial B} \frac{\partial t_1}{\partial B} + Q \frac{\partial^2 t_1}{\partial B^2} - \frac{W}{2} \left( \frac{\partial^2 t_2}{\partial B^2} - \frac{\partial^2 t_1}{\partial B^2} \right) \right. \\ \left. - 2 \left\{ \frac{\alpha W^\beta}{2m} t_1^2 \frac{\partial t_1}{\partial B} - \alpha W^\beta t_1 \frac{\partial t_1}{\partial B} + \frac{\partial Q}{\partial B} (t_1 - M) + Q \frac{\partial t_1}{\partial B} - \frac{W}{2} \left( \frac{\partial t_2}{\partial B} - \frac{\partial t_1}{\partial B} \right) \right\} \frac{\partial t_2}{\partial B} \right. \\ \left. - \left\{ \frac{\alpha W^\beta}{6m} (t_1^3 - M^3) - \frac{\alpha W^\beta}{2} (t_1^2 - M^2) + Q(t_1 - M) + \frac{W(t_2 - t_1)}{2} \right\} \frac{\partial^2 t_2}{\partial B^2} \right] \quad (A.103)$$

The first partial derivative of the interest paid for Case 6 with respect to  $T$  is

$$\frac{\partial IP}{\partial T} = cI_p \left[ \left\{ \frac{\alpha W^\beta}{2m} t_1^2 \frac{\partial t_1}{\partial T} - \alpha W^\beta t_1 \frac{\partial t_1}{\partial T} + \frac{\partial Q}{\partial T} (t_1 - M) + Q \frac{\partial t_1}{\partial T} - \frac{W}{2} \left( \frac{\partial t_2}{\partial T} - \frac{\partial t_1}{\partial T} \right) \right\} (T - t_2) \right. \\ \left. + \left\{ \frac{\alpha W^\beta}{6m} (t_1^3 - M^3) - \frac{\alpha W^\beta}{2} (t_1^2 - M^2) + Q(t_1 - M) + \frac{W(t_2 - t_1)}{2} \right\} \left( 1 - \frac{\partial t_2}{\partial T} \right) \right] \quad (A.104)$$

The second partial derivative of interest paid for Case 6 with respect to  $T$  is

$$\frac{\partial^2 IP}{\partial T^2} = cI_p \left[ \begin{aligned} & \left\{ \frac{\alpha W^\beta}{m} t_1 \frac{\partial t_1}{\partial T} + \frac{\alpha W^\beta}{2m} t_1^2 \frac{\partial^2 t_1}{\partial T^2} - \alpha W^\beta \left( \frac{\partial t_1}{\partial T} \right)^2 - \alpha W^\beta t_1 \frac{\partial^2 t_1}{\partial T^2} + \frac{\partial^2 Q}{\partial T^2} (t_1 - M) \right\} (T - t_2) \\ & + 2 \left\{ \frac{\partial Q}{\partial T} \frac{\partial t_1}{\partial T} + Q \frac{\partial^2 t_1}{\partial T^2} - \frac{W}{2} \left( \frac{\partial^2 t_2}{\partial T^2} - \frac{\partial^2 t_1}{\partial T^2} \right) \right\} \\ & + 2 \left\{ \frac{\alpha W^\beta}{2m} t_1^2 \frac{\partial t_1}{\partial T} - \alpha W^\beta t_1 \frac{\partial t_1}{\partial T} + \frac{\partial Q}{\partial T} (t_1 - M) + Q \frac{\partial t_1}{\partial T} - \frac{W}{2} \left( \frac{\partial t_2}{\partial T} - \frac{\partial t_1}{\partial T} \right) \right\} \left( 1 - \frac{\partial t_2}{\partial T} \right) \\ & - \left\{ \frac{\alpha W^\beta}{6m} (t_1^3 - M^3) - \frac{\alpha W^\beta}{2} (t_1^2 - M^2) + Q(t_1 - M) + \frac{W(t_2 - t_1)}{2} \right\} \frac{\partial^2 t_2}{\partial T^2} \end{aligned} \right] \quad (A.105)$$

Interest paid for Case 7

The first partial derivative of the interest paid for Case 7 with respect to  $W$  is

$$\frac{\partial IP}{\partial W} = cI_p \frac{(t_2 - M)(T - t_2)}{2} \quad (A.106)$$

The second partial derivative of interest paid for Case 7 with respect to  $W$  is

$$\frac{\partial^2 IP}{\partial W^2} = 0 \quad (A.107)$$

The first partial derivative of the interest paid for Case 7 with respect to  $B$  is

$$\begin{aligned} \frac{\partial IP}{\partial B} &= cI_p \frac{W}{2} \left\{ (T - t_2) \frac{\partial t_2}{\partial B} - (t_2 - M) \frac{\partial t_2}{\partial B} \right\} \\ \frac{\partial IP}{\partial B} &= cI_p \frac{W}{2} \{ T - 2t_2 - M \} \frac{\partial t_2}{\partial B} \end{aligned} \quad (A.108)$$

The second partial derivative of interest paid for Case 7 with respect to  $B$  is

$$\frac{\partial^2 IP}{\partial B^2} = cI_p \frac{W}{2} \left[ -2 \left( \frac{\partial t_2}{\partial B} \right)^2 + \{ T - 2t_2 - M \} \frac{\partial^2 t_2}{\partial B^2} \right] \quad (A.109)$$

The first partial derivative of the interest paid for Case 7 with respect to  $T$  is

$$\frac{\partial IP}{\partial T} = cI_p \frac{W}{2} \left\{ (T - t_2) \frac{\partial t_2}{\partial T} - (t_2 - M) \left( 1 - \frac{\partial t_2}{\partial T} \right) \right\} \quad (A.110)$$

The second partial derivative of interest paid for Case 7 with respect to  $T$  is

$$\frac{\partial^2 IP}{\partial T^2} = cI_p \frac{W}{2} \left[ \left( 1 - \frac{\partial t_2}{\partial T} \right) \frac{\partial t_2}{\partial T} + (T - t_2) \frac{\partial^2 t_2}{\partial T^2} - \frac{\partial t_2}{\partial T} \left( 1 - \frac{\partial t_2}{\partial T} \right) + (t_2 - M) \frac{\partial^2 t_2}{\partial T^2} \right] \quad (A.111)$$

Interest paid of Case 8

For the interest paid of Case 8 all the expressions are similar to Case 7.

Interest paid of Case 9 and Case 10

There is not interest paid.

### Supplementary B. Proof of Theorem 1

For any given value of  $W$  and  $B$ , the first and second partial derivatives of equation (A.4) with respect to  $T$  are as follows:

$$\frac{\partial t_1}{\partial T} = \frac{m-T}{\sqrt{(m-T)^2 + \frac{2m(W^{1-\beta} - B^{1-\beta})}{\alpha(1-\beta)}}} \quad (\text{B.1})$$

$$\frac{\partial t_1}{\partial T} = \frac{m-T}{m-t_1} > 0 \quad (\text{B.2})$$

$$\frac{\partial^2 t_1}{\partial T^2} = \frac{-(m-t_1) - (m-T) \frac{\partial t_1}{\partial T}}{(m-t_1)^2} \quad (\text{B.3})$$

$$\frac{\partial^2 t_1}{\partial T^2} = \frac{-(m-t_1) - (m-T) \frac{(m-T)}{(m-t_1)}}{(m-t_1)^2} < 0$$

The first partial derivative of equation (A.5) with respect to  $T$  is

$$\frac{\partial Q}{\partial T} = \frac{\alpha W^\beta}{m} (m-T) > 0 \quad (\text{B.4})$$

The second partial derivative of equation (A.5) with respect to  $T$  is

$$\frac{\partial^2 Q}{\partial T^2} = -\frac{\alpha W^\beta}{m} < 0 \quad (\text{B.5})$$

$$y_i(T) = p(Q-B) + SB + IE - cQ - c_o - chol - IP - uW \quad (\text{B.6})$$

and

$$f(T) = T > 0 \quad (\text{B.7})$$

therefore,

$$q(T) = \frac{y_i(T)}{f(T)} = Z_i(p, B, T) \text{ for } i=1, \dots, 5 \quad (\text{B.8})$$

Differentiate of equation (B.6) with respect to  $T$ ,

$$\frac{\partial y_i(T)}{\partial T} = (p-c) \frac{\partial Q}{\partial T} + \frac{\partial IE}{\partial T} - \frac{\partial chol}{\partial T} - \frac{\partial IP}{\partial T} \quad (\text{B.9})$$

Differentiate the equation (B.9) with respect to  $T$ ,

$$\begin{aligned} \frac{\partial^2 y_i(T)}{\partial T^2} &= (p-c) \frac{\partial^2 Q}{\partial T^2} + \frac{\partial^2 IE}{\partial T^2} - \frac{\partial^2 chol}{\partial T^2} - \frac{\partial^2 IP}{\partial T^2} \\ \frac{\partial^2 y_i(T)}{\partial T^2} &= - \left[ (p-c) \frac{\alpha W^\beta}{m} - \frac{\partial^2 IE}{\partial T^2} + \frac{\partial^2 chol}{\partial T^2} + \frac{\partial^2 IP}{\partial T^2} \right] \\ \frac{\partial^2 y_i(T)}{\partial T^2} &= -J_i \end{aligned} \quad (\text{B.10})$$

Therefore, if  $J_i > 0$  then  $\frac{\partial^2 y_i(T)}{\partial T^2} < 0$ . Hence,  $y_i(T)$  is a strictly concave for  $(i=1, \dots, 5)$ , differentiable and nonnegative function. As a result, if  $J_i > 0$  then  $TP_i(W, B, T)$  is a strictly pseudo-concave function of  $T$ . Therefore, there exists a unique optimal solution.



### Supplementary C. Finding the optimal solution of the cycle length $T^*$ .

From equation (B.6) to (B.7),

$$\frac{y_i(T)}{f(T)} = TP_i(W, B, T) \quad (\text{C.1})$$

Differentiate equation (C.1) with respect to  $T$  is

$$\frac{\partial TP_i(W, B, T)}{\partial T} = \frac{\partial y_i(T)}{\partial T} \cdot \frac{y_i(T)}{T} - \frac{y_i(T)}{T^2} \quad (\text{C.2})$$

From equation (C.2) the necessary and sufficient condition to obtain the value of  $T^*$  is  $\frac{\partial TP_i(W, B, T)}{\partial T} = 0$ . Thus,

$$T \frac{\partial y_i(T)}{\partial T} - y_i(T) = 0 \quad (\text{C.3})$$

If  $J_i > 0$  then

$$T \frac{\partial y_i(T)}{\partial T} = y_i(T) \quad (\text{C.4})$$

### Supplementary D. Proof of Corollary 1

Differentiate equation (A.4) with respect to  $B$  and  $W$ ,

$$\frac{\partial t_1}{\partial B} = \frac{-1}{2\sqrt{(m-T)^2 + \frac{2m(W^{1-\beta} - B^{1-\beta})}{\alpha(1-\beta)}}} \left[ -\frac{2m(1-\beta)}{\alpha(1-\beta)} B^{-\beta} \right] \quad (\text{D.1})$$

$$\frac{\partial t_1}{\partial B} = \frac{m}{\alpha(m-t_1)B^\beta} > 0$$

$$\begin{aligned} \frac{\partial t_2}{\partial W} &= \frac{-1}{2\sqrt{(m-T)^2 + \frac{2m(W^{1-\beta} - B^{1-\beta})}{\alpha(1-\beta)}}} \left[ \frac{2m(1-\beta)W^{-\beta}}{\alpha(1-\beta)} \right] \\ &= \frac{-m}{\alpha(m-t_1)W^\beta} < 0 \end{aligned} \quad (\text{D.2})$$

Differentiate equation (D.1) with respect to  $B$ ,

$$\frac{\partial^2 t_1}{\partial B^2} = \frac{m}{\alpha} \left[ \frac{-(m-t_1)B^{-\beta-1} + B^{-\beta} \frac{\partial t_1}{\partial B}}{(m-t_1)^2} \right] \quad (\text{D.3})$$

Differentiate equation (D.1) with respect to  $W$ ,

$$\frac{\partial^2 t_1}{\partial B \partial W} = \frac{-m^2}{\alpha(m-t_1)^3 (BW)^\beta} \quad (\text{D.4})$$

Differentiate equation (D.2) with respect to  $W$ ,

$$\frac{\partial^2 t_1}{\partial W^2} = \frac{-m}{\alpha} \left[ \frac{-\beta(m-t_1)W^{-\beta-1} + W^{-\beta} \frac{\partial t_1}{\partial W}}{(m-t_1)^2} \right] \quad (\text{D.5})$$

From equations (A.7), (A.8), (A.9), and (A.10) is

$$\frac{\partial Q}{\partial B} = \left( \frac{W}{B} \right)^\beta > 0 \quad (\text{D.6})$$

$$\frac{\partial^2 Q}{\partial W^2} = \frac{-\beta W \left( \frac{\beta(Q-W)}{W} - 1 \right) - \beta(Q-W)}{W^2} < 0 \quad (\text{D.7})$$

$$\frac{\partial^2 Q}{\partial B^2} = \frac{-\beta W^\beta}{B^{1+\beta}} < 0 \quad (\text{D.8})$$

$$\frac{\partial^2 Q}{\partial W \partial B} = \frac{\beta W^{\beta-1}}{B^\beta} > 0 \quad (\text{D.9})$$

For any given value of  $T$ ,

$$TP_i(W, B, T) = \frac{1}{T} X_i(p, B) \quad (\text{D.10})$$

where

$$X_i(W, B) = p(Q - B) + SB + IE - cQ - c_o - chol - IP - uW \quad (\text{D.11})$$

Differentiate the equation (D.11) with respect to  $B$  is

$$\frac{\partial X_i(W, B)}{\partial B} = (p - c) \frac{\partial Q}{\partial B} - p + S + \frac{\partial IE}{\partial B} - \frac{\partial chol}{\partial B} - \frac{\partial IP}{\partial B} \quad (\text{D.12})$$

Differentiate equation (D.12) with respect to  $B$  is

$$L_i = \frac{\partial^2 X_i(W, B)}{\partial B^2} = (p - c) \frac{\partial^2 Q}{\partial B^2} + \frac{\partial^2 IE}{\partial B^2} - \frac{\partial^2 chol}{\partial B^2} - \frac{\partial^2 IP}{\partial B^2} \quad (\text{D.13})$$

Differentiate equation (D.12) with respect to  $W$  is

$$K_i = \frac{\partial^2 X_i(W, B)}{\partial B \partial W} = (p - c) \frac{\partial^2 Q}{\partial B \partial W} + \frac{\partial^2 IE}{\partial B \partial W} - \frac{\partial^2 chol}{\partial B \partial W} - \frac{\partial^2 IP}{\partial B \partial W} \quad (\text{D.14})$$

Differentiate equation (D.11) with respect to  $W$  is

$$\frac{\partial X_i(W, B)}{\partial W} = (p - c) \frac{\partial Q}{\partial W} + \frac{\partial IE}{\partial W} - \frac{\partial chol}{\partial W} - \frac{\partial IP}{\partial W} - u \quad (\text{D.15})$$

Differentiate equation (D.15) with respect to  $W$  is

$$M_i = \frac{\partial^2 X_i(W, B)}{\partial W^2} = (p - c) \frac{\partial^2 Q}{\partial W^2} + \frac{\partial^2 IE}{\partial W^2} - \frac{\partial^2 chol}{\partial W^2} - \frac{\partial^2 IP}{\partial W^2} \quad (\text{D.16})$$

### Supplementary E. Proof of Theorem 2.

Using the equations (D.13), (D.14), and (D.16), we can say  $L_i < 0$ ,  $M_i < 0$  and  $L_i M_i - K_i^2 > 0$ . For a given value of  $T$ , the Hessian matrix of the profit function is negative definite.

$$H = \begin{bmatrix} \frac{\partial^2 X_i(W, B)}{\partial B^2} & \frac{\partial^2 X_i(W, B)}{\partial W \partial B} \\ \frac{\partial^2 X_i(W, B)}{\partial W \partial B} & \frac{\partial^2 X_i(W, B)}{\partial W^2} \end{bmatrix} = \begin{bmatrix} L_i & K_i \\ K_i & M_i \end{bmatrix} \quad (\text{E.1})$$

Then the profit functions  $TP_i(W, B, T)$  are strictly concave in  $E$  and  $W$ . Therefore, there exists a unique optimal solution.
